# Supplementary material for: Cdc42 Mediates Cancer Cell Chemotaxis in Perineural Invasion
Source: Oxford University Press journal article supplement (doi:10.1158/1541-7786.mcr-19-0726), 2020-02-21
Supplement: 15417786mcr190726-sup-225628_2_supp_6090701_q5m3by.docx [file 15417786mcr190726-sup-225628_2_supp_6090701_q5m3by.docx]

Supplemental Figure Legend. A. Immunofluorescence microscopy was performed on control or shCdc42 MiaPaCa2 murine sciatic nerve tumors. Slides were stained with DAPI (blue) nuclear staining and primary antibodies (green) targeting total Cdc42, β-Pix, RET, and phospho-RET. B. Hematoxylin and eosin staining and GTP-Cdc42 immunohistochemistry of a control MiaPaCa2 murine sciatic nerve tumor.
